# Supplementary material
Source: Springer Nature journal article supplement (https://www.springermedizin.de/resource/supplementary/12943_2010_771_MOESM6_ESM.pdf/9554780)

# HepG2

**A.**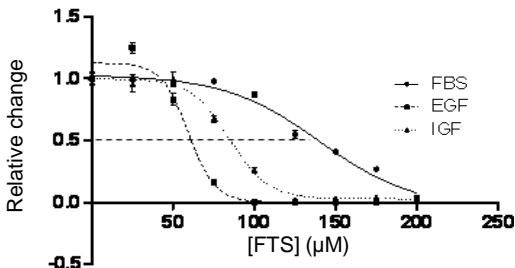

# Huh7

**B.**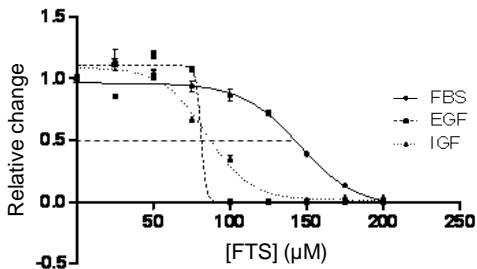

# Hep3B

**C.**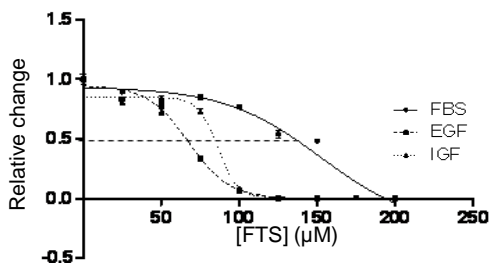

Supplement: MOESM6 [file 9554780]
